# Supplementary material
Source: PubMed Central journal article supplement (PMC7964573)
Supplement: 3368_materials.pdf [file 3368_materials.pdf]

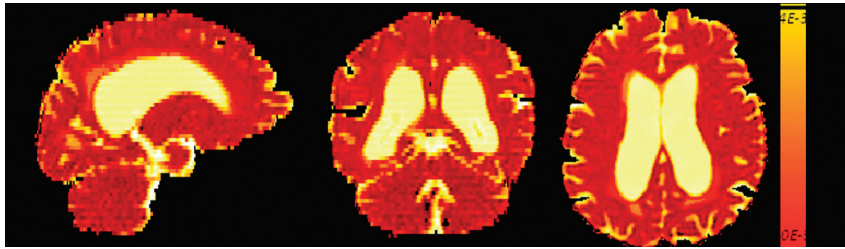

**ON-LINE FIG 1.** MD distribution for a patient with NPH. Notice the area of increased MD in the periventricular white matter.

**On-line Table 1: Classification power for 1D fitting parameters and binary classifier with group 1: NPH; and group 2: AD**

|             | $f_{brain}$ | $\mu_{brain}$ | $\sigma_{brain}$ | $f_{CSF}$ | $\mu_{CSF}$ | $\sigma_{CSF}$ | $f_{mix}$ | $\theta$ | Average MD |
|-------------|-------------|---------------|------------------|-----------|-------------|----------------|-----------|----------|------------|
| Sensitivity | 1.00        | 0.60          | 0.47             | 0.73      | 0.40        | 0.73           | 0.60      | 0.73     | 0.00       |
| Specificity | 0.33        | 0.67          | 0.78             | 0.56      | 0.56        | 0.56           | 0.44      | 0.78     | 1.00       |
| PPV         | 0.71        | 0.75          | 0.78             | 0.73      | 0.60        | 0.73           | 0.64      | 0.85     | 0.00       |
| NPV         | 1.00        | 0.50          | 0.47             | 0.56      | 0.36        | 0.56           | 0.40      | 0.64     | 0.38       |

**Note:**—PPV indicates positive predictive value; NPV, negative predictive value.

**On-line Table 2: Classification power for 1D fitting parameters and binary classifier with group 1: NPH; group 2: AD, PD, DLB**

|             | $f_{brain}$ | $\mu_{brain}$ | $\sigma_{brain}$ | $f_{CSF}$ | $\mu_{CSF}$ | $\sigma_{CSF}$ | $f_{mix}$ | $\theta$ | Average MD |
|-------------|-------------|---------------|------------------|-----------|-------------|----------------|-----------|----------|------------|
| Sensitivity | 0.87        | 0.93          | 0.53             | 0.87      | 0.60        | 0.73           | 0.73      | 0.73     | 1.00       |
| Specificity | 0.52        | 0.44          | 0.80             | 0.68      | 0.56        | 0.44           | 0.44      | 0.80     | 0.48       |
| PPV         | 0.52        | 0.50          | 0.62             | 0.62      | 0.45        | 0.44           | 0.44      | 0.69     | 0.54       |
| NPV         | 0.87        | 0.92          | 0.74             | 0.89      | 0.70        | 0.73           | 0.73      | 0.83     | 1.00       |

**Note:**—PPV indicates positive predictive value; NPV, negative predictive value.
